# Supplementary material for: Outcomes of High-Dose Stereotactic Ablative Radiotherapy to All/Multiple Sites for Oligometastatic Renal Cell Cancer Patients
Source: MDPI journal article supplement (doi:10.3390/curroncol29100619), 2022-10-17
Supplement: s1 [file s1]

Article

# Outcomes of High-Dose Stereotactic Ablative Radiotherapy to All/Multiple Sites for Oligometastatic Renal Cell Cancer Patients

Ming-Wei Ma, Hong-Zhen Li, Xian-Shu Gao, Ming-Zhu Liu, Huan Yin, Kai-Wei Yang, Jia-Yan Chen, Xue-Ying Ren and Dian Wang

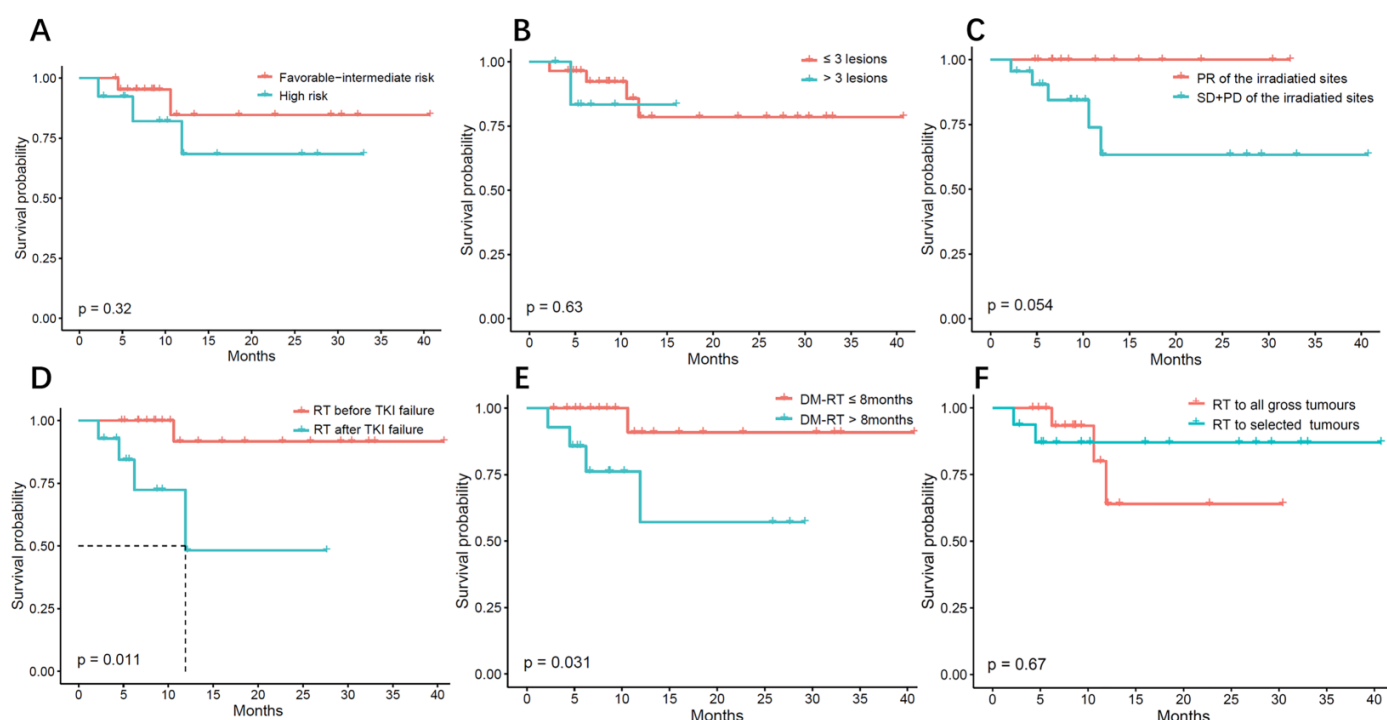

**Supplementary Figure S1.** Local relapse-free survival (LRFS) of oligometastatic renal cell carcinoma patients ( $n = 35$ ) treated with SABR/P-SABR in relation to (A) IMDC risk, (B) number of metastases, (C) response to RT, (D) sequencing with TKI, (E) time from first metastasis to RT, and (F) radiation coverage.

**Supplementary Table S1.** Univariate and multivariate analysis for PFS and OS.

|                               | Univariate analysis for PFS <sup>a</sup> |         | Multivariate analysis for PFS |         | Univariate analysis for OS <sup>b</sup> |         | Multivariate analysis for OS |         |
|-------------------------------|------------------------------------------|---------|-------------------------------|---------|-----------------------------------------|---------|------------------------------|---------|
|                               | HR <sup>c</sup> (95% CI)                 | P value | HR (95% CI)                   | P value | HR (95% CI)                             | P value | HR (95% CI)                  | P value |
| <b>Gender</b>                 |                                          |         |                               |         |                                         |         |                              |         |
| Male                          | 1 (Ref)                                  |         |                               |         | 1 (Ref)                                 |         |                              |         |
| Female                        | 1.16 (0.38-3.52)                         | 0.800   |                               |         | 1.71 (0.42-6.88)                        | 0.452   |                              |         |
| <b>Age</b>                    |                                          |         |                               |         |                                         |         |                              |         |
| <65                           | 1 (Ref)                                  |         |                               |         | 1 (Ref)                                 |         |                              |         |
| ≥65                           | 0.40 (0.13-1.19)                         | 0.097   |                               |         | 0.755 (0.19-3.05)                       | 0.693   |                              |         |
| <b>IMDC<sup>d</sup> score</b> |                                          |         |                               |         |                                         |         |                              |         |

|                                                                         |                   |              |                   |              |                    |              |                     |              |
|-------------------------------------------------------------------------|-------------------|--------------|-------------------|--------------|--------------------|--------------|---------------------|--------------|
| Favorable - intermediate risk                                           | 1 (Ref)           |              |                   |              | 1 (Ref)            |              |                     |              |
| High risk                                                               | 3.88 (1.49-10.07) | <b>0.005</b> | 4.46 (1.54-12.94) | <b>0.006</b> | 5.56 (1.15-26.86)  | <b>0.033</b> | 2.82 (0.51-15.69)   | 0.235        |
| <b>Pathology</b>                                                        |                   |              |                   |              |                    |              |                     |              |
| Clear cell carcinoma                                                    | 1 (Ref)           |              |                   |              | 1 (Ref)            |              |                     |              |
| Other pathological type                                                 | 0.42 (0.10-1.85)  | 0.253        |                   |              | 0.04 (0.00-56.63)  | 0.373        |                     |              |
| <b>Presence of metastases</b>                                           |                   |              |                   |              |                    |              |                     |              |
| Metachronous metastases                                                 | 1 (Ref)           |              |                   |              | 1 (Ref)            |              |                     |              |
| Synchronous metastases                                                  | 1.11 (0.40-3.08)  | 0.847        |                   |              | 1.39 (0.35-5.63)   | 0.642        |                     |              |
| <b>Number of metastatic lesions</b>                                     |                   |              |                   |              |                    |              |                     |              |
| ≤3                                                                      | 1 (Ref)           |              |                   |              | 1 (Ref)            |              |                     |              |
| 4-5                                                                     | 5.70 (1.92-16.86) | <b>0.002</b> | 8.97 (2.58-31.18) | <b>0.001</b> | 12.07 (2.57-56.64) | <b>0.002</b> | 17.06 (2.66-109.55) | <b>0.003</b> |
| <b>Sequencing with TKI<sup>e</sup></b>                                  |                   |              |                   |              |                    |              |                     |              |
| Before failure of TKI                                                   | 1 (Ref)           |              |                   |              | 1 (Ref)            |              |                     |              |
| After failure of TKI                                                    | 2.49 (0.97-6.40)  | 0.057        |                   |              | 6.53 (1.46-29.18)  | <b>0.014</b> | 7.80 (1.24-49.06)   | <b>0.028</b> |
| <b>Time interval from first distant metastasis to radiation therapy</b> |                   |              |                   |              |                    |              |                     |              |
| > the following months                                                  | 1 (Ref)           |              |                   |              | 1 (Ref)            |              |                     |              |
| > 6 months                                                              | 1.68 (0.65-4.34)  | 0.285        |                   |              | 4.64 (0.91-23.72)  | 0.065        |                     |              |
| > 8 months                                                              | 2.54 (0.98-6.61)  | 0.055        |                   |              | 2.76 (0.73-10.51)  | 0.136        |                     |              |
| >12 months                                                              | 2.60 (0.99-6.84)  | 0.053        |                   |              | 3.28 (0.86-12.49)  | 0.082        |                     |              |
| <b>Use of PD-1<sup>f</sup> inhibitor</b>                                |                   |              |                   |              |                    |              |                     |              |
| No                                                                      | 1 (Ref)           |              |                   |              |                    |              |                     |              |
| Yes                                                                     | 1.15 (0.44-3.04)  | 0.778        |                   |              | 1.02 (0.21-4.97)   | 0.981        |                     |              |
| <b>Response of the irradiation sites</b>                                |                   |              |                   |              |                    |              |                     |              |
| PR <sup>g</sup>                                                         | 1 (Ref)           |              |                   |              | 1 (Ref)            |              |                     |              |
| SD <sup>h</sup> + PD <sup>i</sup>                                       | 2.81 (0.93-8.54)  | 0.068        |                   |              | 2.26 (0.47-11.01)  | 0.312        |                     |              |
| <b>Coverage of irradiation sites</b>                                    |                   |              |                   |              |                    |              |                     |              |
| Full coverage                                                           | 1 (Ref)           |              |                   |              | 1 (Ref)            |              |                     |              |
| Partial coverage                                                        | 2.66 (1.04-6.80)  | <b>0.041</b> | 0.55 (0.20-1.53)  | 0.253        | 5.65 (0.70-45.95)  | 0.106        |                     |              |

Abbreviations: <sup>a</sup> PFS, progression-free survival; <sup>b</sup> HR, Hazard ratios; <sup>c</sup> OS, overall survival; <sup>d</sup> IMDC, International Metastatic Renal Cell Carcinoma Database Consortium; <sup>e</sup> TKI, tyrosine kinase inhibitor; <sup>f</sup> PD-1, programmed death-1; <sup>g</sup> PR, partial response; <sup>h</sup> SD, stable disease; <sup>i</sup> PD, progressive disease.
